# Supplementary material for: Reporting ethics approval in health and social sciences articles. An audit of adherence to GDPR and national legislation
Source: Research Square preprint supplement (doi:10.21203/rs.3.rs-378210/v1), 2021-05-03
Supplement: Supplementary file 1 [file fbba68b50efe36e008af1604.pdf]

Table 1. Lack of information on ethical approval in health and social sciences articles with Swedish research persons. Non-sign.  $p > 0,05$ .

| Study characteristics            | Health sciences, somatic focus<br>(n=200) |                              | Health sciences, non-somatic focus<br>(n=200) |                              | Social sciences<br>(n=200) |                              | Total<br>(n=600)    |                              |
|----------------------------------|-------------------------------------------|------------------------------|-----------------------------------------------|------------------------------|----------------------------|------------------------------|---------------------|------------------------------|
|                                  | Information missing                       | Fisher's exact test, p-value | Information missing                           | Fisher's exact test, p-value | Information missing        | Fisher's exact test, p-value | Information missing | Fisher's exact test, p-value |
| All articles                     | 12/200; 6%                                | ---                          | 21/200; 11%                                   | ---                          | 54/200; 27%                | ---                          | 87/600; 15%         | ---                          |
| Study type:                      |                                           |                              |                                               |                              |                            |                              |                     |                              |
| intervention                     | 0/77; 0%                                  | a                            | 3/20; 15%                                     | Non-sign.                    | 3/22; 14%                  | Non-sign.                    | 6/119; 5%           | <0.01                        |
| observation                      | 12/123; 10%                               |                              | 18/180; 11%                                   |                              | 51/178; 29%                |                              | 81/481; 17%         |                              |
| No. of authors:                  |                                           |                              |                                               |                              |                            |                              |                     |                              |
| 1-2                              | 0/5; 0%                                   | a                            | 6/16; 38%                                     | <0.01                        | 24/57; 43%                 | <0.01                        | 30/78; 38%          | <0.001                       |
| >=3                              | 12/195; 6%                                |                              | 15/184; 8%                                    |                              | 30/143; 20%                |                              | 57/522; 11%         |                              |
| University:                      |                                           |                              |                                               |                              |                            |                              |                     |                              |
| with medical school <sup>b</sup> | 12/194; 6%                                | a                            | 12/165; 7%                                    | <0.01                        | 28/116; 27%                | Non-sign.                    | 54/475; 11%         | <0.001                       |
| Other <sup>c</sup>               | 0/6; 0%                                   |                              | 9/35; 26%                                     |                              | 26/84; 31%                 |                              | 35/125; 28%         |                              |

<sup>a</sup> Not possible to calculate because of low numbers

<sup>b</sup> Including university hospitals

<sup>c</sup> Including 7 articles from non-academic institutions

Table 2. Lack of information on ethical approval in social sciences articles by disciplines. Odds ratios for information on ethical approval missing, with 95% confidence intervals.

| Discipline                         | Social sciences<br>(n=200) |                                  |
|------------------------------------|----------------------------|----------------------------------|
|                                    | Information missing        | Odds ratio (95% conf. intervals) |
| All                                | 54/200 (27%)               | 1.00                             |
| Sociology and related <sup>a</sup> | 26/93; 31%                 | 1.05 (0.61;1.82)                 |
| Psychology and related             | 10/32; 31%                 | 1.23 (0.55-2.76)                 |
| Alcohol and substance abuse        | 1/12; 8%                   | 0.25 (0.03-1.95)                 |
| Education                          | 6/20; 30%                  | 1.16 (0.42-3.17)                 |
| Elderly                            | 0/25; 0%                   | 0.11 (0.01-0.82) <sup>c</sup>    |
| Other <sup>b</sup>                 | 11/18; 61%                 | 4.25 (1.57-11.5)                 |

<sup>a</sup> Including social work, criminology, work environment

<sup>b</sup> Including political science, economics, linguistics, sports research, communication, environmental research

<sup>c</sup> 0 instances of missing information replaced by 1 to calculate odds ratio

Table 3. Journal impact factor for articles with and without ethical approval by research area. Means and 95% confidence intervals.

| Research area                         | Ethical approval, mean (95% CI) |                  |
|---------------------------------------|---------------------------------|------------------|
|                                       | Reported                        | Not reported     |
| Health sciences,<br>somatic focus     | 4.55 (4.14;4.96)                | 6.35 (4.05;8.65) |
| Health sciences,<br>non-somatic focus | 3.15 (2.71;3.59)                | 3.04 (2.32;3.76) |
| Social sciences                       | 2.20 (2.03;2.37)                | 1.86 (1.60;2.12) |

Table 4. Ethical comments in articles not reporting on ethical approval by the national Ethics Review Authority (or its predecessor Regional Review Boards).

| Ethical comment                                                                                  | Health science with somatic focus | Health science with non-somatic focus | Social sciences | Total |
|--------------------------------------------------------------------------------------------------|-----------------------------------|---------------------------------------|-----------------|-------|
| Stating “not required” or “not relevant”                                                         | 0                                 | 2                                     | 4               | 6     |
| Referral to approval by local committee or to local guidelines                                   | 0                                 | 0                                     | 5 <sup>a</sup>  | 5     |
| General assurance of adherence to ethical guidelines and/or referral to the Helsinki Declaration | 1                                 | 3                                     | 3               | 7     |
| Student work <sup>b</sup>                                                                        | 0                                 | 2                                     | 0               | 2     |
| None                                                                                             | 11                                | 14                                    | 42              | 67    |

<sup>a</sup> Including 1 study that referred to approval by an agency other than the Ethical Review Authority

<sup>b</sup> Student works are exempted in the Swedish Act on research ethics review
